# Supplementary material for: Multiple Sclerosis Heritability Estimation on Sardinian Ascertained Extended Families Using Bayesian Liability Threshold Model
Source: Genes (Basel). 2023 Aug 2;14(8):1579. doi: 10.3390/genes14081579 (PMC10454167; doi:10.3390/genes14081579)
Supplement: Supplementary file 1 [file genes-14-01579-s001.zip]

Archive with 4 entries (4 files):
- File S1.zip
- File S2.zip
- Supplementary Section S1.pdf
- Supplementary Section S2.pdf
